# Supplementary material
Source: Springer Nature journal article supplement (https://www.springermedizin.de/resource/supplementary/12885_2008_1553_MOESM2_ESM.pdf/9472306)

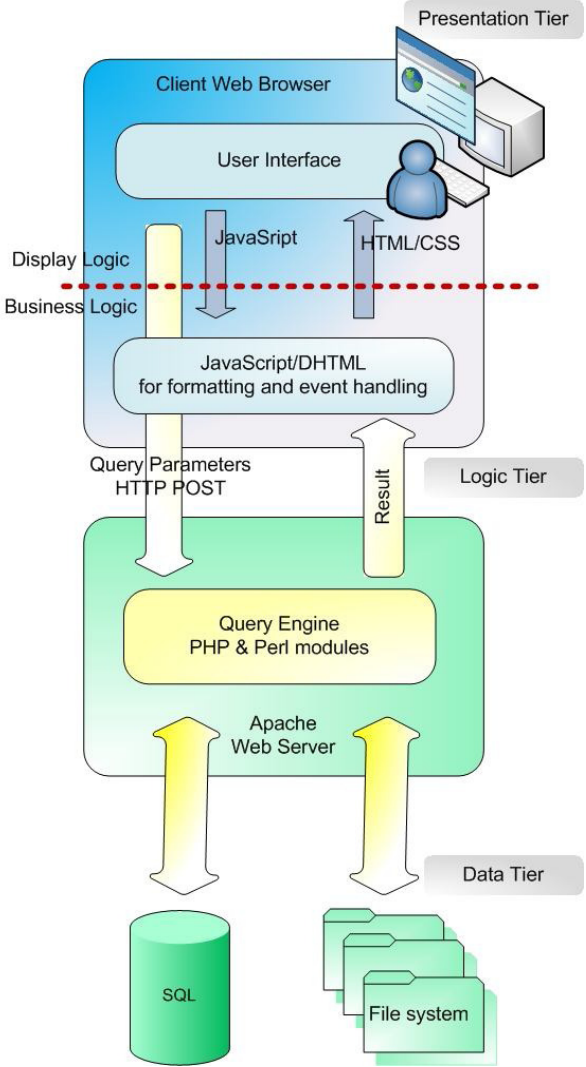

Supplement: MOESM2 [file 9472306]
